# Supplementary material
Source: MDPI journal article supplement (https://www.mdpi.com/2311-5637/9/10/872)
Supplement: s1 [file s1]

Table S1 Factors and levels used in Box – Behnken design

| Factor                        | -1  | 0   | 1   |
|-------------------------------|-----|-----|-----|
| Inoculation proportion (v/v)  | 1:3 | 1:4 | 1:5 |
| Fermentation temperature (°C) | 28  | 30  | 32  |
| Fermentation time (h)         | 48  | 72  | 96  |

Table S2 Ten sensors performance of the e-nose

| Number | Sensor name | Sensitized material       |
|--------|-------------|---------------------------|
| 1      | W1C         | Aromatic ingredients      |
| 2      | W5S         | Oxynitride                |
| 3      | W3C         | Aromatic ingredients      |
| 4      | W6S         | Hydrogen                  |
| 5      | W5C         | Alkyl aromatic components |
| 6      | W1S         | Short chain alkanes       |
| 7      | W1W         | Sulfide                   |
| 8      | W2S         | Alcohol                   |
| 9      | W2W         | Organic sulfide           |
| 10     | W3S         | Alkane                    |

Table S3 Response surface experimental design and results

| Number | Inoculation proportion (v/v) | Fermentation temperature (°C) | Fermentation time (h) | Total ester (g/L) |
|--------|------------------------------|-------------------------------|-----------------------|-------------------|
| 1      | 1:3                          | 28                            | 72                    | 3.68              |
| 2      | 1:5                          | 28                            | 72                    | 3.66              |
| 3      | 1:3                          | 32                            | 72                    | 3.67              |
| 4      | 1:5                          | 32                            | 72                    | 3.72              |
| 5      | 1:3                          | 30                            | 48                    | 3.64              |
| 6      | 1:5                          | 30                            | 48                    | 3.59              |
| 7      | 1:3                          | 30                            | 96                    | 3.58              |
| 8      | 1:5                          | 30                            | 96                    | 3.56              |
| 9      | 1:4                          | 28                            | 48                    | 3.67              |
| 10     | 1:4                          | 32                            | 48                    | 3.64              |
| 11     | 1:4                          | 28                            | 96                    | 3.61              |
| 12     | 1:4                          | 32                            | 96                    | 3.71              |
| 13     | 1:4                          | 30                            | 72                    | 3.94              |
| 14     | 1:4                          | 30                            | 72                    | 3.95              |
| 15     | 1:4                          | 30                            | 72                    | 3.94              |
| 16     | 1:4                          | 30                            | 72                    | 3.92              |
| 17     | 1:4                          | 30                            | 72                    | 3.86              |

Fitting analysis of the test data obtained the regression equation for total ester yield (Y) of navel orange fermented beverage:

$$Y=3.92+2.5A+0.017B+0.011C-0.018D-0.035AB-0.028AC+5.00E-003AD-0.018BC-7.500E-003BD+0.032CD-0.21A^2-0.17B^2-0.081C^2-0.16D^2$$

Table S4 Response surface experimental design and results (µg/L)

|                               | <i>Saccharomyces cerevisiae</i> SC-125 | Angel Yeast SY | Co-fermentation |
|-------------------------------|----------------------------------------|----------------|-----------------|
| Ethyl caproate                | 39.59                                  | 102.54         | 135.25          |
| Ethyl caprylate               | 272.18                                 | 862.2          | 1566.06         |
| Methyl octanoate              | 104.55                                 | 115.62         | 427.12          |
| Methyl caprate                | 688.11                                 | 341.01         | 965.76          |
| Methyl palmitate              | 180.66                                 | 245.31         | 805.03          |
| Ethyl palmitate               | 334.59                                 | 546.56         | 1884.92         |
| Ethyl caprate                 | 942.29                                 | 765.76         | 2495.75         |
| Ethyl acetate                 | 278.52                                 | 262.11         | 364.86          |
| Ethyl laurate                 | 226.48                                 | 310.53         | 424.61          |
| Phenethyl acetate             | 799.09                                 | 806.23         | 1376.09         |
| Isoamyl acetate               | 127.49                                 | 108.92         | 154.32          |
| Ethyl 3-Phenylpropionate      | 27.93                                  | 25.86          | 60.58           |
| Dibutyl phthalate             | 24.10                                  | 36.43          | 112.28          |
| Octadecanoic acid,ethyl ester | 20.42                                  | 35.62          | 114.62          |
| Methyl oleate                 | 120.50                                 | 0              | 218.75          |
| Andrographolide               | 2.01                                   | 5.23           | 16.43           |
| Isoamyl caprylate             | 0                                      | 0              | 15.84           |

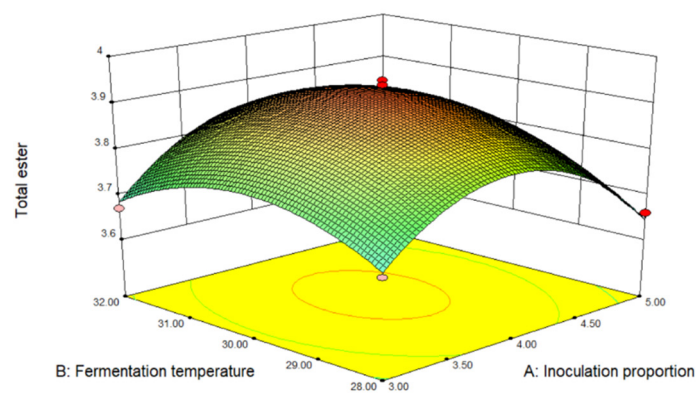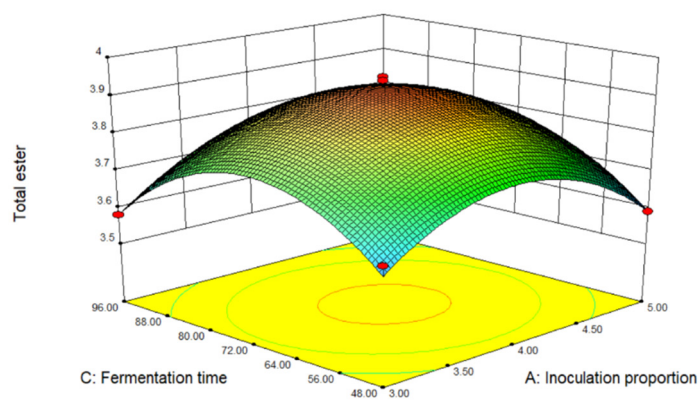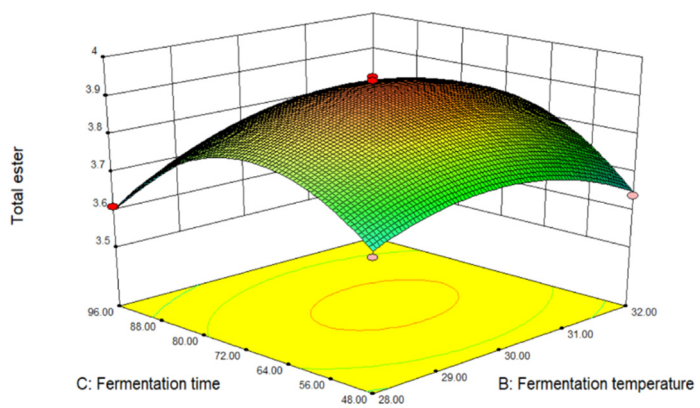

Figure. S1 Interaction between single factors
